# Supplementary material for: Tracing the decision-making process for myelofibrosis: diagnosis, stratification, and management of ruxolitinib therapy in real-word practice
Source: PubMed Central journal article supplement (PMC6944647; doi:10.1007/s00277-019-03847-z), 2019-12-12
Supplement: 277_2019_3847_MOESM1_ESM.pdf [file 277_2019_3847_MOESM1_ESM.pdf]

## ELECTRONIC SUPPLEMENTARY MATERIAL

*Annals of Hematology*

### Tracing the decision-making process for myelofibrosis: Diagnosis, stratification and management of ruxolitinib therapy in real-world practice

Massimo Breccia, Claudia Baratè, Giulia Benevolo, Massimiliano Bonifacio, Elena Maria Elli, Paola Guglielmelli, Margherita Maffioli, Alessandra Malato, Francesco Mendicino, Giuseppe Alberto Palumbo, Novella Pugliese, Elena Rossi, Elisa Rumi, Emanuela Sant'Antonio, Alessandra Ricco, Mario Tiribelli, Francesca Palandri

Dr. Massimo Breccia

Hematology, Department of Precision and Translational Medicine, Policlinico Umberto 1, Sapienza University, Rome, Italy

breccia@bce.uniroma1.it

**Supplementary Table 1. Questionnaire and related answers**

| Questions                                                                                                          | Possible answers                                                                                                                                                                                                        | Percentages                     |
|--------------------------------------------------------------------------------------------------------------------|-------------------------------------------------------------------------------------------------------------------------------------------------------------------------------------------------------------------------|---------------------------------|
| 1. Where do you practice your clinical activity?                                                                   | a. University<br>b. Public hospital<br>c. Private practice                                                                                                                                                              | 43.75%<br>56.25%<br>0%          |
| 2. How many years of experience do you have in the treatment of chronic myeloproliferative syndromes?              | a. <5<br>b. 5-10<br>c. >10                                                                                                                                                                                              | 12.5%<br>31.25%<br>56.25%       |
| 3. How many newly diagnosed myelofibrosis (MF) patients do you see per year?                                       | a. <5<br>b. 5-10<br>c. >10                                                                                                                                                                                              | 0%<br>43.75%<br>56.25%          |
| 4. You have experience in treating patients with:                                                                  | a. Only MF<br>b. MF and PV<br>c. MF and ET<br>d. MF, PV, ET                                                                                                                                                             | 0%<br>0%<br>0%<br>100%          |
| 5. Do you use the IPSS score at baseline?                                                                          | a. Yes<br>b. No                                                                                                                                                                                                         | 100%<br>0%                      |
| 6. Do you use the MIPSS or MIPSS-70 score at baseline?                                                             | a. Yes<br>b. No                                                                                                                                                                                                         | 25%<br>75%                      |
| 7. Do you use the DIPSS score during treatment?                                                                    | a. Yes<br>b. No                                                                                                                                                                                                         | 93.75%<br>6.25%                 |
| 8. Do you use the MYSEC-PM score for secondary MF?                                                                 | a. Yes<br>b. No                                                                                                                                                                                                         | 81.25%<br>18.75%                |
| 9. When do you decide to re-evaluate with bone marrow biopsy a patient with PV in case of MF suspected evolution?  | a. In the case of development/progression of splenomegaly<br>b. In the case of systemic symptoms not present before<br>c. If phlebotomies are no longer needed<br>d. When at least two of the previous criteria are met | 25%<br>0%<br>6.25%<br>68.75%    |
| 10. When do you decide to re-evaluate with bone marrow biopsy a patient with ET in case of MF suspected evolution? | a. In the case of development of splenomegaly<br>b. In the case of systemic symptoms not present before<br>c. If cytoreduction is no longer needed<br>d. When at least two of the previous criteria are met             | 18.75%<br>0%<br>12.5%<br>68.75% |
| 11. How often do you regularly visit a patient with IPSS low / intermediate-1 risk?                                | a. Once a month<br>b. Once every 3 months<br>c. Once every 6 months                                                                                                                                                     | 0%<br>62.5%<br>37.5%            |

|                                                                                                                                     |                                                                                                                                                                                                                                 |                                  |
|-------------------------------------------------------------------------------------------------------------------------------------|---------------------------------------------------------------------------------------------------------------------------------------------------------------------------------------------------------------------------------|----------------------------------|
|                                                                                                                                     | d. Once a year                                                                                                                                                                                                                  | 0%                               |
| 12. How often do you regularly visit a patient with IPSS intermediate-2/high risk? (excluding transfusion-only access)              | a. Once a month<br>b. Once every 3 months<br>c. Once every 6 months<br>d. Once a year                                                                                                                                           | 50%<br>43.75%<br>6.25%<br>0%     |
| 13. When do you treat a patient with low IPSS risk?                                                                                 | a. Only in case of IPSS int-2 progression<br>b. If splenomegaly is > 5 cm<br>c. If symptoms are present<br>d. I do not treat patients with IPSS low risk but I only observe them                                                | 6.25%<br>31.25%<br>37.5%<br>25%  |
| 14. When do you treat a patient with intermediate-1 IPSS risk?                                                                      | a. If splenomegaly is > 5 cm<br>b. If symptomatic (TSS > 40 or very high single item score)<br>c. a+b<br>d. I do not treat patients with IPSS int-1 risk                                                                        | 6.25%<br>0%<br>93.75%<br>0%      |
| 15. Do you have the opportunity to test for non-driver mutation in your center?                                                     | a. Yes<br>b. No                                                                                                                                                                                                                 | 37.5%<br>62.5%                   |
| 16. Do you test non-driver mutation (i.e. ASXL1, etc) in your patients?                                                             | a. No<br>b. Yes, always also for patients positive for driver mutations<br>c. Yes, only for young patients (< 50 years)<br>d. Yes, but only for intermediate-1 risk patients to decide the best therapeutic transplant strategy | 25%<br>12.5%<br>25%<br>37.5%     |
| 17. Do you perform cytogenetic analysis in MF patients?                                                                             | a. Yes, routinely for all<br>b. Never<br>c. Only for patients <50 years                                                                                                                                                         | 81.25%<br>0%<br>18.75%           |
| 18. How do you routinely evaluate splenomegaly?                                                                                     | a. Manually<br>b. With ultrasound<br>c. With abdominal CT/NMR                                                                                                                                                                   | 56.25%<br>43.75%<br>0%           |
| 19. For an int-2/high risk patient, do you use first-line ruxolitinib immediately?                                                  | a. No, only after hydroxyurea<br>b. Yes, immediately                                                                                                                                                                            | 12.5%<br>87.5%                   |
| 20. Before starting ruxolitinib, in view of the possible reactivation of hepatotropic viruses, do you check for hepatitis serology? | a. Yes, but only for HBsAg<br>b. Yes, I check for full panel and also HBV-DNA<br>c. I do not perform for all patients but only in patients with previous positivity                                                             | 12.5%<br>87.5%<br>0%             |
| 21. In case of seropositive patient for hepatitis B, do you perform a prophylaxis?                                                  | a. Yes<br>b. No                                                                                                                                                                                                                 | 87.5%<br>12.5%                   |
| 22. Do you screen for previous TBC infection before to start with ruxolitinib?                                                      | a. Yes, always<br>b. No, never<br>c. Yes, only in case of a past medical history                                                                                                                                                | 93.75%<br>0%<br>6.25%            |
| 23. For TBC test, what do you mostly use?                                                                                           | a. QuantiFERON-TB Gold<br>b. Mantoux intradermal test<br>c. CT scan                                                                                                                                                             | 81.25%<br>12.5%<br>6.25%         |
| 24. Before starting treatment with ruxolitinib, do you perform viral serology for herpetic viruses (CMV, HSV1-2, EBV, VZV)?         | a. Never<br>b. Yes, always<br>c. Only for some frequent viruses                                                                                                                                                                 | 50%<br>37.5%<br>12.5%            |
| 25. Do you perform antiviral prophylaxis during ruxolitinib treatment?                                                              | a. No, never<br>b. Yes, always<br>c. Yes, but only in patients with a history of previous infections<br>d. Yes, but only in secondary prophylaxis after one or more episodes of herpes zoster reactivation during treatment     | 6.25%<br>0%<br>18.75%<br>75%     |
| 26. How do you behave in case of infection during ruxolitinib?                                                                      | a. Reduce temporarily the dose<br>b. Discontinue the drug and then resume at the same dose after the resolution of the event<br>c. Definitely discontinue the drug<br>d. Discontinue the drug and the resume                    | 62.5%<br>37.5%<br>0%<br>0%       |
| 27. How do you schedule the monitoring visits starting with ruxolitinib?                                                            | a. Once a week for the first 2-3 months<br>b. Every 15 days<br>c. Once a month<br>d. Initially weekly and then depends on hematologic toxicity                                                                                  | 12.5%<br>18.75%<br>25%<br>43.75% |
| 28. In case of hematologic toxicity (grade 3 anemia):                                                                               | a. Discontinue the treatment<br>b. Reduce the dosage                                                                                                                                                                            | 0%<br>18.75%                     |

|                                                                                                                |                                                                                                                                                                                                                                                                                                                                         |                                   |
|----------------------------------------------------------------------------------------------------------------|-----------------------------------------------------------------------------------------------------------------------------------------------------------------------------------------------------------------------------------------------------------------------------------------------------------------------------------------|-----------------------------------|
|                                                                                                                | c. Transfuse the patient (even naïve) and continue with the same dosage                                                                                                                                                                                                                                                                 | 81.25%                            |
| 29. Do you use erythropoietin during treatment with ruxolitinib in case of anemia?                             | a. Never<br>b. Yes, always<br>c. Yes, but only in patients with serum EPO dosage lower than then normal                                                                                                                                                                                                                                 | 12.5%<br>25%<br>62.5%             |
| 30. In case of hematological toxicity (grade 3 thrombocytopenia):                                              | a. Discontinue the treatment<br>b. Reduce the dosage<br>c. Transfuse the patient (even naïve) and continue with the same dosage                                                                                                                                                                                                         | 18.75%<br>81.25%<br>0%            |
| 31. In case of toxicity and need for interruption, how do you carry out the suspension?                        | a. Gradually reduce and then discontinue<br>b. Discontinue the drug abruptly                                                                                                                                                                                                                                                            | 87.5%<br>12.5%                    |
| 32. After how long on average patients report a resolution / improvement in their symptoms?                    | a. 1-2 weeks from the start of treatment<br>b. 3-4 weeks from the start of treatment                                                                                                                                                                                                                                                    | 62.5%<br>37.5%                    |
| 33. Do you use the MPN10 instrument to quantify symptoms?                                                      | a. Yes<br>b. No                                                                                                                                                                                                                                                                                                                         | 75%<br>25%                        |
| 34. Based on your experience, how many patients with low / intermediate-1 risk are symptomatic?                | a. 30-40%<br>b. Less than 30%<br>c. More than 50%                                                                                                                                                                                                                                                                                       | 25%<br>62.5%<br>12.5%             |
| 35. How do you rate a splenic response to ruxolitinib?                                                         | a. Consider the COMFORT studies criteria (> 35% reduction in basal volume)<br>b. Consider a reduction > 50% of the spleen length<br>c. According to 2013 IWG criteria                                                                                                                                                                   | 25%<br>31.25%<br>43.75%           |
| 36. Do you consider a dose reduction in the long-term responder?                                               | a. Never<br>b. Yes, always<br>c. Yes, but only if the patient has concomitant toxicity                                                                                                                                                                                                                                                  | 25%<br>31.25%<br>43.75%           |
| 37. When do you consider a patient in therapeutic failure after treatment with ruxolitinib?                    | a. In case of absolute lack of splenic response and symptoms<br>b. Worsening of general conditions (increase in symptoms and splenomegaly) during treatment<br>c. There are no failure criteria and therefore I continue the treatment even if the patient has responded only from a symptomatic point of view                          | 18.75%<br>43.75%<br>37.5%         |
| 38. Do you consider re-evaluating bone biopsy during treatment?                                                | a. Yes, in patients with complete response<br>b. No<br>c. Yes, after at least one year of treatment                                                                                                                                                                                                                                     | 50%<br>18.75%<br>31.25%           |
| 39. Do you consider possible pharmacological associations in patients with non-optimal response?               | a. No<br>b. Yes                                                                                                                                                                                                                                                                                                                         | 81.25%<br>18.75%                  |
| 40. What is the drug you most frequently associate with ruxolitinib?                                           | a. Erythropoietin<br>b. Hydroxyurea<br>c. Anabolic<br>d. Vitamins                                                                                                                                                                                                                                                                       | 25%<br>43.75%<br>6.25%<br>25%     |
| 41. Do you perform a transplant assessment in patients under the age of 70 (more than one answer is possible)? | a. At baseline, if IPSS Intermediate-2 /High<br>b. At progression, if DIPSS Intermediate-2 / High<br>c. If IPSS / DIPSS Intermediate-1 in the presence of factors that negatively impact the prognosis<br>d. Only if the patient does not reach or lose a response to ongoing treatments and in the absence of therapeutic alternatives | 93.75%<br>56.25%<br>81.25%<br>25% |
